# Supplementary material
Source: MDPI journal article supplement (https://www.mdpi.com/2073-4441/14/24/4122)
Supplement: s1 [file s1]

| Sampling point        | Wastewater treatment plant indication | Number of connected residents |
|-----------------------|---------------------------------------|-------------------------------|
| Elbe (Debrné)         | Špindlerův Mlýn                       | 853                           |
|                       | Vrchlabí                              | 12 000                        |
|                       | Hostinné                              | 4 320                         |
| Elbe (Hradec Králové) | Dvůr Králové and Labem I              | 14 506                        |
|                       | Dvůr Králové and Labem II             | 14 580                        |
|                       | Jaroměř                               | 12 350                        |
| Elbe (Valy)           | Hradec Králové                        | 101 783                       |
|                       | Pardubice                             | 133 200                       |
|                       | Vysoká and Labem                      | 1 491                         |
| Elbe (Obříství)       | Kolín                                 | 38 110                        |
|                       | Spolana Neratovice                    | 16 626                        |
|                       | Poděbrady                             | 15 764                        |
| Elbe (Děčín)          | Ústí nad Labem                        | 88 606                        |
|                       | Děčín                                 | 45 027                        |
|                       | Litoměřice                            | 38 015                        |

|          |                            |        |
|----------|----------------------------|--------|
| Orlice   | Ústí nad Orlicí            | 15 049 |
|          | Choceň                     | 8 905  |
|          | Letohrad                   | 5 800  |
| Doubrava | Ždírec nad Doubravou       | 2 156  |
|          | Záboří nad Labem           | 1240   |
|          | Žleby                      | 1155   |
| Cidlina  | Jičín                      | 17 851 |
|          | Nový Bydžov                | 8510   |
|          | Chlumeck nad Cidlinou      | 5344   |
| Mrlina   | Kopidlno                   | 1 536  |
|          | Rožďalovice                | 1 539  |
|          | Křinec                     | 1 482  |
| Jizera   | Mladá Boleslav II Podlázky | 25 913 |
|          | Mladá Boleslav I Nruberk   | 18 533 |
|          | Turnov                     | 16 002 |

Table S1: List of most important wastewater treatment plants located upstream from indicated sampling points

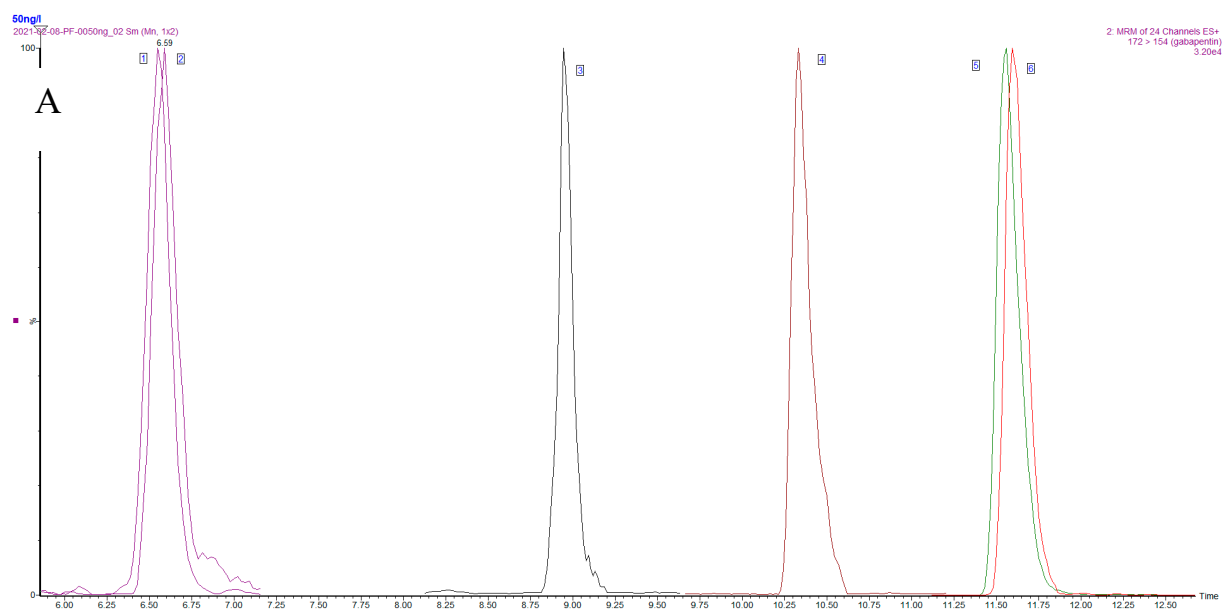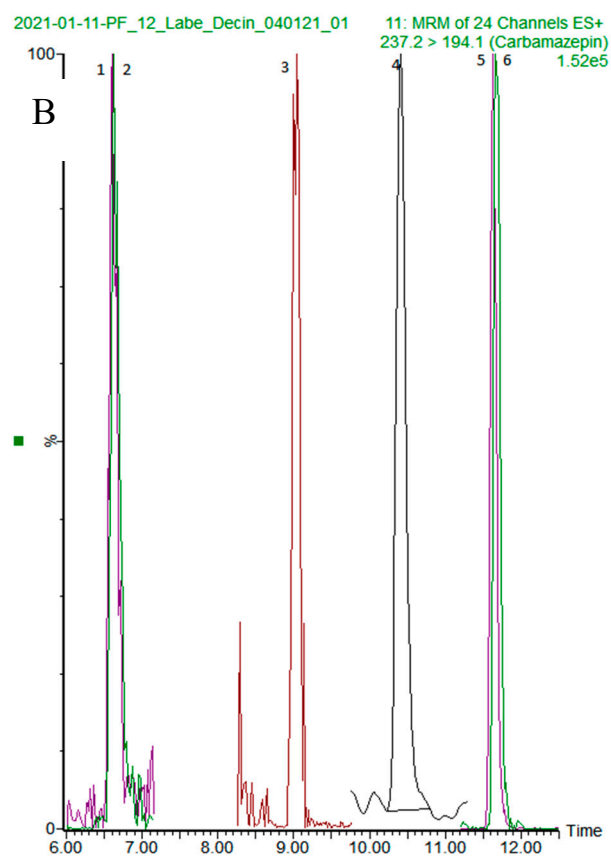

Figure S1: Chromatograms from the analysis A- internal standard; B – water sample; 1 – gabapentin D4, 2 – gabapentin, 3- lamotrigine, 4 – gabapentin – lactam, 5 – carbamazepine D2, 6 - carbamazepine
